# Supplementary material
Source: Springer Nature journal article supplement (https://www.springermedizin.de/resource/supplementary/12936_2011_1723_MOESM2_ESM.pdf/9541628)

9°40'18''E

9°46'35''E

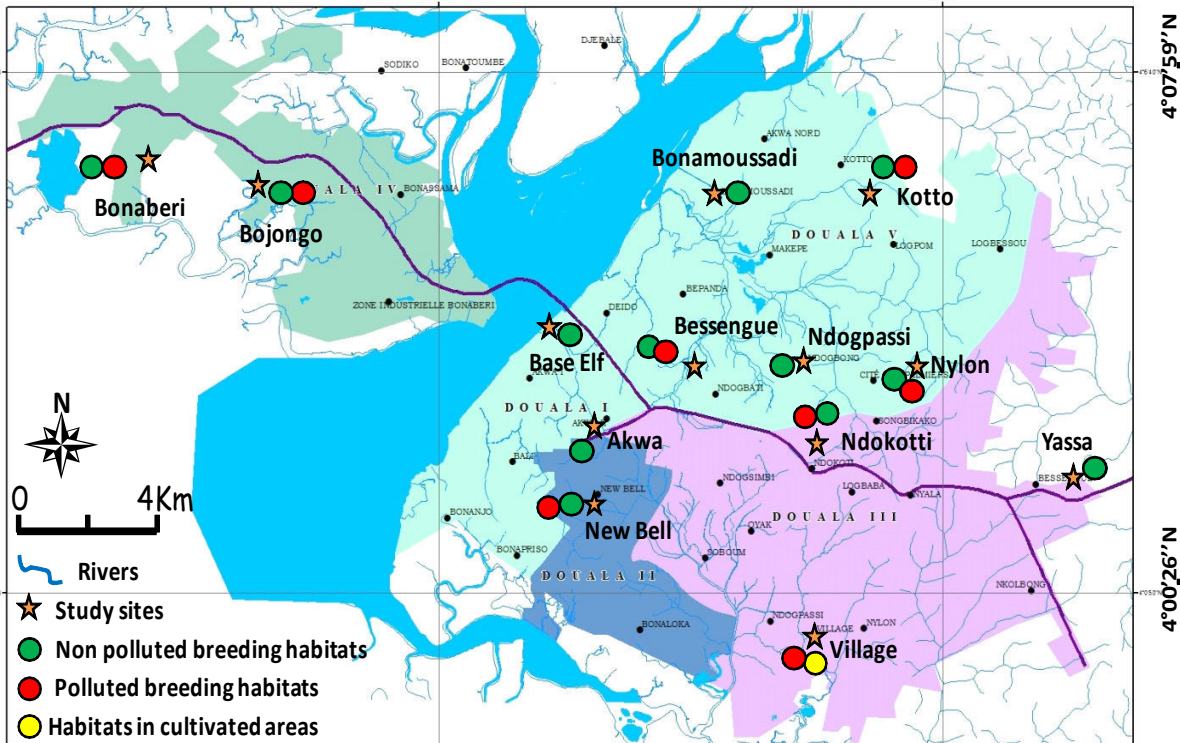

Supplement: MOESM2 [file 9541628]
